## WITHDRAWN ARTICLE

**WITHDRAWN: LncRNA PRNCR1 regulates osteogenic differentiation in osteolysis after hip replacement by targeting miR-211-5p***Zong-ming Gong; Zhen-yu Tang; Xiao-liang Sun**Biosci Rep* (2018) BSR20180042; **DOI:** 10.1042/BSR20180042

The Accepted Manuscript version of this article (published on 11 May 2018) was withdrawn on 22 July 2021. Following the acceptance of this article, a reader has alerted the Editorial Office of *Bioscience Reports* that this paper has since been accepted and published in *Gene* (<https://doi.org/10.1016/j.gene.2018.05.043>). This goes against the Editorial Policies of *Bioscience Reports*, hence the accepted article has been withdrawn.
